1 Article

2  
3 **Super-enhancer switching drives a burst in germline**  
4 **gene expression at the mitosis-to-meiosis transition**

5  
6 So Maezawa<sup>1, 2, 3\*</sup>, Masashi Yukawa<sup>2, 4</sup>, Xiaoting Chen<sup>5</sup>, Akihiko Sakashita<sup>1, 2</sup>, Kris G.  
7 Alavattam<sup>1, 2</sup>, Matthew T. Weirauch<sup>2, 5, 6</sup>, Artem Barski<sup>2, 4</sup>, and Satoshi H. Namekawa<sup>1, 2\*</sup>

8  
9 <sup>1</sup> Division of Reproductive Sciences, Division of Developmental Biology, Perinatal Institute,  
10 Cincinnati Children's Hospital Medical Center, Cincinnati, Ohio, 45229, USA

11 <sup>2</sup> Department of Pediatrics, University of Cincinnati College of Medicine, Cincinnati, Ohio, 45229,  
12 USA

13 <sup>3</sup> Department of Animal Science and Biotechnology, School of Veterinary Medicine, Azabu  
14 University, Sagamihara, Kanagawa 252-5201, Japan

15 <sup>4</sup> Division of Allergy and Immunology, Division of Human Genetics, Cincinnati Children's  
16 Hospital Medical Center, Cincinnati, Ohio, 45229, USA

17 <sup>5</sup> Center for Autoimmune Genomics and Etiology, Cincinnati Children's Hospital Medical Center,  
18 Cincinnati, Ohio, 45229, USA

19 <sup>6</sup> Divisions of Biomedical Informatics and Developmental Biology, Cincinnati Children's Hospital  
20 Medical Center, Cincinnati, Ohio, 45229, USA

21  
22 \*Corresponding authors: E-mail: [s-maezawa@azabu-u.ac.jp](mailto:s-maezawa@azabu-u.ac.jp); [satoshi.namekawa@cchmc.org](mailto:satoshi.namekawa@cchmc.org)

23  
24  
25 **Abstract**

26  
27 **The testis has the most diverse and complex transcriptome of all organs due to bursts in**  
28 **expression of thousands of germline-specific genes. Much of this unique gene expression takes**  
29 **place when mitotic germ cells differentiate and enter into meiotic prophase. Here, we**  
30 **demonstrate that the genome-wide reorganization of super-enhancers (SEs) drives bursts of**  
31 **germline genes after the mitosis-to-meiosis transition. At the mitosis-to-meiosis transition,**  
32 **mitotic SEs dissolve while meiotic SEs are established. Meiotic SEs are associated with the**  
33 **activation of key germline genes, defining the cellular identity of germ cells. This SE switching**  
34 **is regulated by the establishment of meiotic SEs via A-MYB (MYBL1), a key transcription**  
35 **factor for germline genes, and by the resolution of mitotic SEs via SCML2, a germline-specific**  
36 **Polycomb protein required for spermatogenesis-specific gene expression. Prior to the entry**  
37 **into meiosis, meiotic SEs are preprogrammed in mitotic spermatogonia, serving to direct the**  
38 **unidirectional differentiation of spermatogenesis. We identify key regulatory factors for both**  
39 **mitotic and meiotic enhancers, revealing a molecular logic for the concurrent activation of**  
40 **mitotic enhancers and suppression of meiotic enhancers in the somatic and/or mitotically**  
41 **proliferating phase.**

## 42 **Introduction**

43 Meiosis is an essential step in the preparation of haploid gametes, and the transition from  
44 mitotic proliferation to meiosis is a fundamental event in the maturation of germ cells. In the  
45 mammalian male germline, this mitosis-to-meiosis transition coincides with a fundamental change  
46 to the transcriptome: a dynamic and massive change in genome-wide gene expression<sup>1-4</sup>. Due to  
47 the burst in expression of thousands of germline genes at the mitosis-to-meiosis transition, the testis  
48 has the most diverse and complex transcriptome of all organs<sup>2,5,6</sup>. Further, during spermatogenesis,  
49 progressive, dynamic chromatin remodeling takes place to produce haploid spermatids<sup>7</sup>. Together  
50 with genome-wide changes in gene expression, the mitosis-to-meiosis transition accompanies the  
51 dynamic reorganization of epigenetic modifications, accessible chromatin, and 3D chromatin  
52 conformation to prepare for the next generation of life<sup>4,8-12</sup>. Yet despite these recent advances in  
53 our understanding of the mitosis-to-meiosis transition, it remains largely unknown how DNA  
54 regulatory elements underlie the massive, dynamic transcriptional change in the male germline.  
55

56 With this in mind, one class of DNA regulatory elements is of particular interest: enhancers.  
57 Enhancers play key roles in the control of cell type-specific gene expression programs through the  
58 binding of transcription factors (TFs) and interaction with promoters<sup>13-15</sup>. Mammalian cells contain  
59 thousands of active enhancers<sup>16</sup>. A portion of these enhancers cluster in aggregate to regulate the  
60 expression of genes important for establishing cellular identity<sup>17,18</sup>; these enhancer clusters have  
61 been termed ‘super-enhancers’ (SEs)<sup>17</sup>. SEs are prevalent in various cell and tissue types, and are  
62 also found in cancer cells, where they direct the expression of key tumor pathogenesis genes<sup>19</sup>.  
63 However, for the most part, the characterization of SEs has been limited to somatic and/or  
64 mitotically proliferating cells. Given the massive scale and scope of the mitosis-to-meiosis  
65 transcriptome change, there are compelling questions as to the existence of a uniquely meiotic type  
66 of SEs and, if present, to the function of SEs in the meiotic phase. Although a previous study  
67 suggested that enhancer activation is not involved in mouse spermatogenesis<sup>8</sup>, the detailed profiles  
68 of active enhancers remain undetermined in spermatogenesis.  
69

70 Here, we determine the profiles of active enhancers in representative stages of  
71 spermatogenesis in mice and identify a meiotic type of SEs. We demonstrate that the switch from  
72 mitotic to meiotic types of SEs drives a dynamic change in the transcriptome at the mitosis-to-  
73 meiosis transition. This SE switching is regulated by the establishment of meiotic SEs via A-MYB  
74 (MYBL1), a key transcription factor for germline genes<sup>20,21</sup>, and by the resolution of mitotic SEs  
75 via SCML2, a germline-specific Polycomb protein required for spermatogenesis-specific gene  
76 expression<sup>3</sup>. We found that meiotic SEs are preprogrammed in undifferentiated spermatogonia  
77 prior to the mitosis-to-meiosis transition, suggesting that gene activation in meiosis takes place  
78 based on epigenetic mechanisms of preprogramming. Through systematic analyses, we identified key  
79 regulatory factors for both mitotic and meiotic enhancers, thereby exposing the molecular logic of  
80 concurrent activation mechanisms for mitotic enhancers and suppression mechanisms for meiotic  
81 enhancers in the somatic and/or mitotically proliferating phase.  
82

## 83 **Results**

### 84 **The landscape of active enhancers during spermatogenesis**

85 To determine the landscape of active enhancers in spermatogenesis, we performed  
86 chromatin immunoprecipitation with sequencing (ChIP-seq) for the histone modification H3K27ac,  
87 a marker of active enhancers<sup>22</sup>. We analyzed four representative stages of wild-type  
88 spermatogenesis: THY1<sup>+</sup> undifferentiated spermatogonia, a population that contains both  
89 spermatogonial stem cells and progenitor cells; KIT<sup>+</sup> differentiating spermatogonia from P7 testes;  
90 purified pachytene spermatocytes (PS) in meiotic prophase; and postmeiotic round spermatids (RS)  
91 from adult testes (Fig. 1a). We carried out H3K27ac ChIP-seq for two independent biological  
92 replicates, and we confirmed that ChIP-seq signals are consistent at genomic loci between the

93 replicates (Fig. 1b, Supplementary Fig. 1). (While generated for and analyzed in this study, our  
94 H3K27ac ChIP-seq data for wild-type PS and RS was initially introduced in another study that  
95 analyzed active enhancers on the sex chromosomes<sup>23</sup>.) Consistent with the massive, dynamic  
96 transcriptional change occurring at the mitosis-to-meiosis transition, we observed H3K27ac peaks  
97 in mitotically proliferating spermatogonia (blue shadow), H3K27ac peaks unique to meiotic  
98 spermatocytes (red shadow), and constitutive peaks (gray shadow: Fig. 1b).  
99

100 For the quantitative comparison of active enhancers during spermatogenesis, we analyzed  
101 H3K27ac ChIP-seq peaks  $\pm 1$  kb outside transcription start sites (TSSs); hereafter, we refer to such  
102 peaks as ‘distal peaks’ and peaks within  $\pm 1$  kb as ‘proximal peaks.’ Through the use of MACS2<sup>24</sup>,  
103 a program that identifies the significant enrichment of ChIP-seq signals, we detected 11,433 distal  
104 H3K27ac ChIP-seq peaks that were present in at least one stage of spermatogenesis (for these  
105 analyses, we permitted only distal peaks with a normalized enrichment value of  $\geq 4$ ; see Methods;  
106 Supplementary Table 1). The distal peaks were categorized into 9 clusters through k-means  
107 clustering; we further organized these into three classes as follows (Fig. 1c). The first class (705  
108 peaks, comprising clusters 1-3) represents constitutive active enhancers, i.e., those observed  
109 throughout spermatogenesis. The second class (2,524 peaks, comprising clusters 4 and 5) represents  
110 enhancers that are active in the mitotic proliferation phase of spermatogenesis (i.e., the ‘mitotic  
111 phase’) but are inactive in meiotic and postmeiotic phases. Notably, the third class (8,204 peaks,  
112 comprising clusters 6-10) consists of enhancers that are largely inactive in the mitotic phase yet are  
113 highly active in meiotic and postmeiotic stages. The number of H3K27ac ChIP-seq peaks gradually  
114 increases over the course of spermatogenic differentiation. Taken together, on the contrary to a  
115 previous view that mouse spermatogenesis is not involved in enhancer activation<sup>8</sup>, these results  
116 demonstrate that large numbers of active enhancers are established *de novo* in spermatogenesis.  
117

118 To elucidate how active enhancers change in the course of spermatogenesis, we examined  
119 the dynamics of H3K27ac peaks at various transitions from one stage to another. For these analyses,  
120 we used MAnorm, a peak-analysis program that facilitates quantitative comparisons of peaks  
121 derived from two pairwise next-generation sequencing datasets (see Methods)<sup>25</sup>. Although  
122 H3K27ac proximal peaks were largely common at each transition, distal H3K27ac peaks  
123 representative of active enhancers underwent dynamic changes in spermatogenesis (Fig. 1d). With  
124 regard to distal H3K27ac peaks, a large fraction persisted between THY1<sup>+</sup> and KIT<sup>+</sup>  
125 spermatogonia; we refer to such peaks as ‘common’ (Fig. 1d). These data suggest that, for the most  
126 part, THY1<sup>+</sup> and KIT<sup>+</sup> spermatogonia share a largely common profile of active enhancers. In  
127 comparison, MAnorm analysis between KIT<sup>+</sup> spermatogonia and PS revealed a dynamic change in  
128 the distribution of active enhancers at the mitosis-to-meiosis transition. This result suggests that a  
129 majority of active enhancers in KIT<sup>+</sup> spermatogonia disappear prior to meiosis, and the extensive  
130 *de novo* formation of active enhancers takes place in meiotic prophase (Fig. 1d). For the large part,  
131 this *de novo* formation of active enhancers occurred in intergenic and intronic regions. The  
132 continued alteration of active enhancers occurred from meiotic PS to postmeiotic RS, and we  
133 observed the additional *de novo* establishment of active enhancers in RS (Fig. 1d).  
134

### 135 ***De novo* establishment of super-enhancers after the mitosis-to-meiosis transition facilitates** 136 **robust expression of key spermatogenesis genes**

137 To elucidate how massive, dynamic transcriptional change is stimulated at the mitosis-to-  
138 meiosis transition, we sought to test the following hypothesis: The transcriptional change of the  
139 mitosis-to-meiosis transition is associated with the establishment of “super-enhancers (SEs).” SEs  
140 are genomic regulatory units made up of multiple enhancers, bound by transcription factors to  
141 control key regulatory genes required for cellular identity<sup>17,19,26</sup>. SEs have been defined as large  
142 chromatin domains enriched with H3K27ac and/or other active enhancer marks<sup>27</sup>; drawing on this  
143 definition, we identified SEs based on elevated H3K27ac enrichment in spermatogenesis using the

144 following criteria: 1) Enhancers within 12.5 kb of each other were consolidated into a single entity;  
145 (2) enhancer entities were ranked by H3K27ac ChIP-seq signal intensity; finally, (3) enhancer  
146 entities enriched with H3K27ac signal above a certain cutoff were defined as SEs (see Methods).  
147 Using this definition, we found that SEs are established in the course of spermatogenesis, and they  
148 increase in number as germ cells mature: We identified 65 SEs in THY1<sup>+</sup> spermatogonia, 182 SEs  
149 in KIT<sup>+</sup> spermatogonia, 487 SEs in PS, and 1,114 SEs in RS (Fig. 2a, Supplementary Table 2). The  
150 number of SEs established *de novo* increases as spermatogenesis progresses (Fig. 2b). Among the  
151 65 SEs in THY1<sup>+</sup> spermatogonia, 85% (55/65) are common to SEs identified in KIT<sup>+</sup>  
152 spermatogonia (Fig. 2c), indicating a largely common profile of SEs in mitotically dividing THY1<sup>+</sup>  
153 and KIT<sup>+</sup> spermatogonia. However, among the 182 SEs in KIT<sup>+</sup> spermatogonia, only 32% (59/182)  
154 are common to SEs in PS (Fig. 2b). These data reveal the dynamic, *de novo* formation of SEs at the  
155 mitosis-to-meiosis transition. After the mitosis-to-meiosis transition, 57% (278/487) of SEs in PS  
156 were common to SEs in RS; we observed the establishment of 836 new SEs in RS (Fig. 2b).  
157

158 We identified distinct characteristics of SEs common to the mitotic stages (i.e., between  
159 THY1<sup>+</sup> and KIT<sup>+</sup> spermatogonia), and the SEs common to the meiotic (i.e., PS) and postmeiotic  
160 (i.e., RS) stages. First, with respect to SEs common to mitotic stages (THY1<sup>+</sup> and KIT<sup>+</sup>  
161 spermatogonia), H3K27ac was decreased in PS, but tended to persist throughout spermatogenesis  
162 into at least as late as the RS stage; for example, H3K27ac was still present after the resolution of  
163 a SE on chromosome 15 (Fig. 2c). We designate SEs unique to THY1<sup>+</sup> and/or KIT<sup>+</sup> spermatogonia  
164 ‘mitotic SEs.’ Through average tag density analyses, we confirmed that decreased H3K27ac  
165 persisted to as late as the RS stage at the genomic loci of mitotic SEs (Fig. 2d). On the other hand,  
166 with respect to SEs unique to PS, H3K27ac was largely absent from corresponding genomic loci  
167 in THY1<sup>+</sup> and KIT<sup>+</sup> spermatogonia, but H3K27ac was robustly established during the mitosis-to-  
168 meiosis transition (Fig. 2c, d). We term SEs unique to PS and/or RS ‘meiotic SEs.’ Intriguingly,  
169 meiotic SEs tend to consist of large and broad H3K27ac peaks, while mitotic SEs tend to comprise  
170 clusters of distinct, narrow H3K27ac peaks (Figs. 2c and 2d); SEs with this distinct, narrow  
171 conformation have been reported as a general feature of tissue-specific SEs in other mitotically  
172 proliferating cells<sup>17-19</sup>.  
173

174 Next, we examined whether meiotic SEs are associated with specific gene expression  
175 programs after the mitosis-to-meiosis transition. Gene ontology analysis revealed that genes  
176 adjacent to meiotic SEs (i.e., genes within 20 kb upstream to 50 kb downstream of SEs) are enriched  
177 for roles in “spermatogenesis” and “male gamete function” (Fig. 2e). We identified 101 genes that  
178 were categorized for “spermatogenesis,” and this gene group is highly expressed after the mitosis-  
179 to-meiosis transition (Fig. 2f, Supplementary Table 3). This group includes key regulators of  
180 spermatogenesis such as *Brdt*, a key chromatin regulator in spermatogenesis<sup>28</sup>; and *Trdr1* and  
181 *Piwi1* (also known as *Miwi*), components of the Piwi-interacting RNA pathway<sup>29,30</sup>; *Msh4*, an  
182 essential gene for meiotic recombination<sup>31</sup>; and other spermatogenesis genes including *Ggn*, *Prm3*,  
183 and *Tssk2* (Fig. 2f). Next, we investigated whether genes adjacent to meiotic SEs are subject to  
184 higher expression than genes that are not adjacent to meiotic SEs. Among 2,623 late  
185 spermatogenesis genes (i.e., genes that are not highly expressed in spermatogonia but are highly  
186 expressed in PS and/or RS by a  $\geq 4$ -fold change compared to spermatogonia: a gene list is included  
187 in Supplementary Table 4), 652 genes are located adjacent to meiotic SEs (i.e., genes within 20 kb  
188 upstream to 50 kb downstream of SEs). These genes are robustly expressed compared to the  
189 remaining 1,971 late spermatogenesis genes that are not adjacent to SEs (Fig. 2g). These results  
190 suggest that the *de novo* establishment of meiotic SEs facilitates robust expression of key  
191 spermatogenesis genes.  
192

193 **A-MYB binding is associated with the establishment of meiotic SEs for targeted activation of**  
194 **germline genes**

195 Enhancers contain transcription factor (TF)-binding sites to regulate the expression of  
196 target genes<sup>32</sup>. Thus, we sought to identify TF-binding motifs that underlie gene expression  
197 programs unique to spermatogenesis, specifically those associated with the mitosis-to-meiosis  
198 transition. Using the motif analysis program MEME-ChIP<sup>33</sup>, we identified consensus motifs similar  
199 to known TF-binding motifs in active enhancers. To identify TF-binding sites indicative of the  
200 mitotic stage versus the meiotic stage, we compared H3K27ac ChIP-seq peaks between KIT<sup>+</sup>  
201 spermatogonia versus PS. Among the H3K27ac peaks unique to KIT<sup>+</sup>, the TF-binding motif with  
202 the lowest *E* value (i.e., an *E* value =  $4.3 \times 10^{-16}$ ; *E* values are expected values output by the MEME  
203 expectation maximization algorithm)<sup>34</sup> contained motifs for STAT family transcription factors  
204 (STAT1, STAT3, and STAT5a). This is in line with the function of STAT3 in spermatogonial  
205 differentiation<sup>35</sup>. The motif with the second lowest *E*-value (*E*-value =  $1.5 \times 10^{-13}$ ) contains a  
206 common binding motif for FOX family transcription factors (FOXK1, FOXJ3, and FOXG1).  
207

208 Of note, these data for motif enrichment in KIT<sup>+</sup> spermatogonia are distinct from data  
209 obtained for KIT<sup>+</sup> spermatogonia in our previous study of accessible chromatin (detected via  
210 ATAC-seq; like H3K27ac ChIP-seq speaks, ATAC-seq peaks are indicators of cis-regulatory  
211 elements)<sup>9</sup>. To more carefully examine the union and/or exclusivity of motifs in H3K27ac and  
212 ATAC peaks, we performed HOMER motif analyses<sup>36</sup> using an expanded TF binding motif library  
213 taken from the Cis-BP database<sup>37</sup> (see Methods). H3K27ac and ATAC double-positive peaks in  
214 KIT<sup>+</sup> spermatogonia contain consensus motifs such as NR5A2, a TF implicated in germ cell  
215 development; the retinoid receptors RXRA and RXRB; and binding motifs for FOS, FOSL2, and  
216 JUND. These data are common with previously identified motifs in ATAC peaks in KIT<sup>+</sup>  
217 spermatogonia<sup>9</sup> (Fig. 3b, Supplementary Table 5). Notably, in KIT<sup>+</sup> spermatogonia, consensus  
218 motifs for DMRT1, a key TF that regulates the mitosis-to-meiosis transition<sup>38</sup>, were enriched only  
219 in ATAC-positive/H3K27ac-negative peaks, suggesting that DMRT1 functions outside of active  
220 enhancers (Fig. 3b). A similar feature was also found in PS: The binding motifs for the POU/OCT  
221 family of TFs (POU2F, POU3F, and POU1F1) were found only in ATAC-positive/H3K27ac-  
222 negative peaks, suggesting that the POU/OCT family of TFs functions outside of active enhancers  
223 in PS (Fig. 3b).  
224

225 The PS-unique motifs found within H3K27ac peaks revealed a common and notable  
226 feature between MEME-ChIP and HOMER motif analyses: A strong enrichment of MYB binding  
227 motifs was identified by both analysis pipelines (MEME-ChIP analysis, GGCAGTT: *E* value =  
228  $5.6 \times 10^{-25}$ , Fig. 3a; HOMER motif analysis, Fig. 3b, Supplementary Table 5). These MYB motifs  
229 are recognized by A-MYB (also known as MYBL1), a key transcription factor for germline genes<sup>20</sup>,  
230 and are also strongly enriched in A-MYB testes ChIP-seq peaks<sup>21</sup>. Using this previously published  
231 dataset, we identified A-MYB ChIP-seq peaks at the center of SE-associated H3K27ac peaks on  
232 the X chromosome and autosomes in PS (Fig. 3c). Given the role of A-MYB in the regulation of  
233 meiotic transcription, these data raise the possibility that A-MYB binding may nucleate  
234 establishment of meiotic enhancers and SEs onto the surrounding chromatin. MANorm analyses  
235 revealed that, genome-wide, most A-MYB peaks overlap H3K27ac peaks (Fig. 3d), which further  
236 supports the function of A-MYB in priming meiotic enhancers.  
237

238 Importantly, we found that meiotic SEs overlap pachytene piRNA clusters, which produce  
239 pachytene piRNAs (Fig. 3c, right panel, and Fig. 3e). Among pachytene piRNA clusters, we found  
240 that BTBD18-dependent piRNA loci are highly likely to overlap meiotic SEs (Fig. 3e); BTBD18  
241 is an essential factor for pachytene piRNA production by way of transcriptional elongation<sup>39</sup>. Since  
242 A-MYB is essential for the production of pachytene piRNA<sup>21</sup>, these data lend further support to the  
243 assertion that A-MYB functions in the priming of meiotic SEs; furthermore, A-MYB and meiotic  
244 SEs may comprise, in part or whole, a potential mechanism for the production of pachytene piRNA.  
245

246 To test whether meiotic SE-associated genes are regulated by A-MYB, we analyzed  
247 previously published RNA-seq data from the testes of *A-myb* mutants (*Mybl1<sup>repro9</sup>*) and  
248 heterozygous littermate controls at P14<sup>35</sup> (Fig. 3f). We observed a significant overlap of meiotic  
249 SE adjacent genes and genes differentially expressed in *A-myb* mutants (211 differentially  
250 expressed genes out of 652 meiotic SE adjacent genes (32.7%); this is in comparison to 1,705  
251 differentially expressed genes out of all 22,661 RefSeq genes in the genome (7.5%);  $P = 1.0 \times 10^{-79}$ ;  
252 hypergeometric probability test), and many of the differentially expressed genes were found in the  
253 downregulated genes of *A-myb* mutants. Together, these results suggest that A-MYB-binding might  
254 trigger the establishment of meiotic SEs to activate target germline genes (Fig. 3g).  
255

### 256 **SCML2 is required for the resolution of mitotic SEs during meiosis**

257 Next, we sought to determine a mechanism underlying the resolution of mitotic SEs at the  
258 mitosis-to-meiosis transition. We focused our investigation on the function of SCML2, a germline  
259 specific Polycomb protein that is responsible for dynamic transcriptional changes at the transition<sup>3</sup>;  
260 in mice deficient for *Scml2* (i.e., *Scml2*-knockout (KO) mice), somatic/progenitor genes were  
261 derepressed on autosomes after the mitosis-to-meiosis transition, and robust activation of late-  
262 spermatogenesis genes was compromised as well<sup>3</sup>. Although H3K27ac peaks were comparable  
263 between the THY1<sup>+</sup> and KIT<sup>+</sup> spermatogonia of both *Scml2*-KO mice and wild-type littermate  
264 controls (Supplementary Fig. 2a), MANorm analysis revealed a large number of unique H3K27ac  
265 peaks at intergenic and intronic regions in PS of *Scml2*-KO mice compared to wild-type controls  
266 (at intergenic regions, 1,549 peaks in wild-type and 1,951 peaks in *Scml2*-KO; at intronic regions,  
267 845 peaks in wild-type and 4,461 peaks *Scml2*-KO; Fig. 4a). Intriguingly, the increased number of  
268 H3K27ac peaks in *Scml2*-KO PS appeared to result from the retention of mitotic enhancers after  
269 the mitosis-to-meiosis transition: H3K27ac peaks at mitotic SEs, which are resolved in wild-type  
270 PS, were, for the most part, retained in *Scml2*-KO PS and RS (Supplementary Fig. 2b). Average  
271 tag density analysis confirmed the genome-wide retention of H3K27ac at SEs from *Scml2*-KO KIT<sup>+</sup>  
272 spermatogonia to PS and RS (Fig. 4b). Given this evidence, and since SCML2 suppresses  
273 somatic/progenitor genes in meiosis<sup>3</sup>, these results suggest that the SCML2-mediated resolution of  
274 mitotic SEs constitutes a potential mechanism for the suppression of somatic/progenitor genes at  
275 the mitosis-to-meiosis transition.  
276

277 We also observed that the intensity of H3K27ac at meiotic SEs was slightly decreased in  
278 *Scml2*-KO PS (Fig. 4c), and *Scml2*-KO RS saw a further decrease in H3K27ac intensity (Fig. 4d).  
279 These observations are consistent with the down-regulation of late-spermatogenesis genes in PS  
280 and RS *Scml2*-KO mice<sup>3</sup>. SCML2 is required for the establishment of H3K27me3 during meiosis,  
281 forming two major classes of bivalent genomic domains comprised of H3K27me3 and  
282 H3K4me2/3: Class I domains, which are associated with developmental regulator genes; and Class  
283 II domains, which are associated with somatic/progenitor genes<sup>40</sup>. We observed an increase in  
284 H3K27ac signal intensity at both classes of bivalent domains in *Scml2*-KO mice (Supplementary  
285 Fig. 2c). We presume that this is the consequence—at least in part—of an antagonistic relationship  
286 between H3K27me3 and H3K27ac, since both post-translational modifications occupy the same  
287 amino acid residue (K27) of the histone H3 tail.  
288

### 289 **SCML2 is required for the formation of SEs on the X chromosome during meiosis**

290 Switching focus to meiosis, we performed analyses to elucidate the mechanisms governing  
291 the establishment of active enhancers on the male sex chromosomes. During male meiosis, the sex  
292 chromosomes undergo regulation distinct from autosomes due to a central regulatory mechanism  
293 known as meiotic sex chromosomes inactivation (MSCI)<sup>41,42</sup>. MSCI engages a DNA damage  
294 response (DDR) pathway to catalyze and regulate sex chromosome gene silencing in PS, an  
295 essential occurrence prior to the activation of a subset of sex chromosome genes in RS<sup>43,44</sup>. RNF8,  
296 an E3 ligase and key DDR factor, is responsible for the establishment of ubiquitination on the sex

297 chromosomes, along with the establishment of active histone modifications such as the enhancer  
298 mark H3K27ac, thereby regulating the activation of a subset of sex chromosome genes that escape  
299 post-meiotic silencing<sup>23,44</sup>. Contrasting with our genome-wide profiles of H3K27ac (Fig. 1), we  
300 observed a scarcity of distal H3K27ac peaks on the sex chromosomes of THY1<sup>+</sup> and KIT<sup>+</sup>  
301 spermatogonia (Fig. 5a). Of note, in accordance with the chromosome-wide establishment of  
302 H3K27ac signals on the XY body as detected by fluorescence microscopy<sup>23</sup>, many H3K27ac peaks  
303 (930 intergenic and 327 intronic peaks of total 1851 peaks) were established *de novo* on the sex  
304 chromosomes in the intergenic and intronic regions from KIT<sup>+</sup> spermatogonia to PS (Fig. 5a).

305  
306 To dissect the regulatory mechanisms underlying this process, we focused on SCML2,  
307 which has a critical regulatory function on the sex chromosomes independent of its functions on  
308 autosomes<sup>3</sup>. SCML2 functions downstream of the DDR pathway that initiates MSCI, where it  
309 cooperates with RNF8 to establish H3K27ac<sup>23</sup>. MANorm analysis revealed that, on the sex  
310 chromosomes of PS and RS, a large portion of distal H3K27ac peaks (particularly those in  
311 intergenic and intronic regions) depend on SCML2 (Fig. 5b). Our prior report showed that,  
312 interestingly, ATAC-seq peaks appeared specifically on the sex chromosomes of PS in an SCML2-  
313 dependent fashion too<sup>9</sup>. Together, these data indicate that SCML2 is a key regulatory factor for  
314 chromatin accessibility and H3K27ac deposition on the sex chromosomes in meiosis. Accordingly,  
315 26 SEs are established on the X chromosomes in meiosis (Fig. 5c), and these largely depend on  
316 SCML2 (Fig. 5d). Intriguingly, this is unlike SCML2's function to resolve mitotic SEs after the  
317 mitosis-to-meiosis transition (Fig. 4); as such, we observed increased numbers of SEs on the  
318 autosomes of *Scml2*-KO PS (Fig. 5d). Together, these results demonstrate distinct autosome- and  
319 sex chromosome-specific functions for SCML2 in the regulation of enhancers in spermatogenesis.

### 320 321 **Meiotic super-enhancers on autosomes are poised in undifferentiated spermatogonia**

322 SEs on the sex chromosomes are established downstream of the DDR pathway that initiates  
323 MSCI. This DDR-dependent regulation of the sex chromosomes is specific to the unpaired — or  
324 unsynapsed — status of the hemizygous male sex chromosomes in meiosis, when homologous  
325 autosomes otherwise fully synapse to facilitate recombination<sup>42</sup>. Given this difference between sex  
326 chromosomes and autosomes, we suspected that SEs on the autosomes are regulated by a distinct  
327 mechanism. Thus, to determine the mechanism by which autosomal SEs are established, we  
328 examined the epigenetic status of meiotic SEs in progenitor cells. We examined H3K4me2 and  
329 H3K4me3, active marks that were previously reported to be associated with poised gene promoters  
330 during spermatogenesis<sup>4</sup>. Notably, prior to the establishment of H3K27ac, H3K4me2 was present  
331 on autosomal meiotic SEs in THY1<sup>+</sup> and KIT<sup>+</sup> spermatogonia (Fig. 6a). Additionally, H3K4me3 is  
332 also enriched on autosomal meiotic SEs in THY1<sup>+</sup> spermatogonia (Fig. 6a). These features were  
333 unique to meiotic SEs: Other meiotic enhancers detected through analyses of distal H3K27ac peaks  
334 did not exhibit these features (Supplementary Fig. 3a). These results suggest that meiotic SEs are  
335 poised as early as the THY1<sup>+</sup> spermatogonia phase to prepare for the expression of key  
336 spermatogenesis genes after the mitosis-to-meiosis transition. These features were not observed on  
337 meiotic SEs associated with the X chromosome (Fig. 6b), lending further support for the distinct  
338 regulation of meiotic SEs between autosomes and the X chromosome. While poised chromatin is  
339 unique to autosomal meiotic SEs—and not associated with other meiotic enhancers—we found that  
340 the TSSs of late spermatogenesis genes are also broadly poised for activation in spermatogonia  
341 (Supplementary Fig. 3b)<sup>4</sup>. Together, these data indicate that SE-associated late spermatogenesis  
342 genes on autosomes are poised for activation in two layers: SEs and TSSs (Fig. 6c). We propose  
343 that this form of epigenomic programming ensures the unidirectional differentiation of  
344 spermatogenesis (Fig. 6c).

345  
346 Next, we sought to identify mechanisms for the expression of postmeiotic spermatid  
347 specific genes. On autosomes in PS, at distal H3K27ac peaks around RS-specific genes, we

348 observed an increase in H3K27ac and H3K4me3 signals prior to activation in RS, and H3K27ac  
349 and H3K4me3 signals became highly enriched in RS (Supplementary Fig. 3c). On the other hand,  
350 on the X chromosome in PS, at distal H3K27ac peaks around RS-specific genes, H3K27ac and  
351 H3K4me2 became temporary enriched in PS prior to gene activation in RS (Supplementary Fig.  
352 3d). Since, on the sex chromosomes, accumulation of H3K4me2 and H3K27ac takes place  
353 downstream of RNF8 function, and accumulation of H3K4me2 and H3K27ac is regulated by  
354 SCML2 too<sup>23,44</sup>, these results serve to further reveal gene activation mechanisms that are distinct  
355 between autosomes and the sex chromosomes in haploid RS.

356

### 357 **Identification of key regulatory factors for both mitotic and meiotic enhancers**

358 Finally, we took advantage of our new data sets to infer general mechanisms underlying  
359 the regulation of mitotic and meiotic enhancers. Since the meiotic gene program is, by and large,  
360 repressed in cell types that undergo mitotic divisions, we sought to identify putative TFs that  
361 meet one of two counteractive conditions: (1) Those that can operate on and/or promote the  
362 activity of mitotic enhancers, and (2) those that can suppress meiotic enhancers. To this end, we  
363 used our recently published RELI (Regulatory Element Locus Intersection) algorithm<sup>45</sup>, to  
364 compare the genomic locations of our H3K27ac peak data with a large collection of publicly  
365 available ChIP-seq data. Taking the genomic location information for H3K27ac peaks detected to  
366 be mitotic enhancers in KIT<sup>+</sup> spermatogonia, we analyzed the intersections between these data and  
367 publicly available ChIP-seq data sets for many TFs in many contexts. Since the overwhelming  
368 majority of public ChIP-seq data are from somatic cells that undergo mitotic divisions in between  
369 cell cycles, this informs (at least) one interpretation for such an experiment: The enrichment of  
370 intersections between mitotic enhancers and TFs could be indicative of general mechanisms that  
371 operate on mitotic enhancers. In addition to TFs that were previously associated with  
372 spermatogonia, such as STAT3, TCF3, MAZ, and ETS1<sup>35,46,47</sup>, we identified additional factors  
373 with enriched ChIP-seq peaks at distal H3K27ac peaks in KIT<sup>+</sup> spermatogonia: SRF, TCF12,  
374 GATA4, BCL6, CEBPB, and MAX (Fig. 7a, Supplementary Table 6). When we applied the same  
375 analysis to mitotic SEs, we identified UBTF, RBP1, CHD1, ZFX, and KLF4 as specific factors that  
376 may be involved in their regulation (Fig. 7b, Supplementary Table 7). Among them, ZFX was  
377 previously implicated in spermatogenesis<sup>48</sup>. Next, we applied this strategy to identify factors that  
378 suppress meiotic enhancers in the mitotic phase. Compellingly, at the sites for meiotic enhancers  
379 as determined by the loci of distal H3K27ac peaks in PS, we revealed high enrichment for factors  
380 that comprise, in part, transcriptional silencing machinery, including REST, TRIM28, RCOR2,  
381 SIN3A, and YY1 (Fig. 7c, Supplementary Table 8). Of note, when we applied this analysis to  
382 meiotic SEs in the mitotic phase, we identified KDM5A, a histone demethylase that acts on  
383 H3K4me3, as the factor having the highest enrichment at meiotic SEs (Fig. 7d, Supplementary  
384 Table 9). Together, these analyses systematically identify putative regulators of mitotic and meiotic  
385 enhancers, providing clues for understanding their underlying molecular mechanisms.

386

### 387 **Discussion**

388 In this study, we determined the profiles of active enhancers in representative stages of  
389 spermatogenesis, and we demonstrated that SE switching underlies the dynamic transcriptome  
390 change of the mitosis-to-meiosis transition. Our results establish an overarching molecular logic  
391 for this switching: SCML2 resolves mitotic SEs, and A-MYB establishes meiotic SEs to regulate  
392 meiotic transcription. Recent reports indicate that it is, generally speaking, the nature of SEs to  
393 regulate gene expression that underlies the cellular identity of cell types<sup>17,18</sup>; with this in mind, the  
394 A-MYB-dependent regulation of meiotic SEs becomes a conceivable mechanism for gene  
395 expression that defines the cellular identity of germ cells in late spermatogenesis. Our analyses  
396 revealed SE-adjacent genes such as *Brdt*, *Miwill*, and *Tdrd1*—genes that are critical for late  
397 spermatogenesis. Thus, these genes may be candidate genes for cellular identity. In particular,  
398 *Miwill* and *Tdrd1* are involved in the regulation of piRNA<sup>29,30</sup>, and A-MYB is required for the



399 expression of *Miwil1* and *Tdrd1*<sup>21</sup>. For example, A-MYB directly regulates transcription of  
400 pachytene piRNA clusters, and robust pachytene piRNA production is thought to be regulated by  
401 a feed forward loop as part of the transcriptional activation of piRNA clusters and the expression  
402 of piRNA regulators such as MIWIL1 and TDRD1<sup>21</sup>. Our data support the possibility that this  
403 feedforward loop is mediated by the establishment of meiotic SEs. Interestingly, the A-MYB-  
404 dependent activation of germline genes is an ancient mechanism also found in rooster testes<sup>21</sup>. So,  
405 it is interesting to speculate that the establishment of meiotic SEs by A-MYB could be an ancient  
406 mechanism too—and one that was possibly exploited by, or otherwise coopted by, pachytene  
407 piRNA production in the course of evolutionary history. Given the robust and evolutionarily  
408 conserved nature of germline gene activation via SEs, such a mechanism stands in stark contrast to  
409 a concomitant mechanism whereby rapidly evolved enhancers, driven by endogenous retroviruses,  
410 activate species-specific genes after the mitosis-to-meiosis transition of spermatogenesis (Sakashita  
411 et al., co-submitted).

412  
413 In tumor cells, SEs are regulated by BRD4, a member of the bromodomain and  
414 extraterminal (BET) subfamily of proteins, and inhibition of BRD4 results in the dysregulation of  
415 SE-associated genes, including the *MYC* proto-oncogene<sup>26</sup>. In spermatogenesis, a testis-specific  
416 member of the BET family, BRDT, is required for the meiotic gene expression program<sup>28</sup>, and  
417 small-molecule inhibition of BRDT caused spermatogenic failure<sup>49</sup>. Given the molecular  
418 similarities between BRD4 and BRDT, it is possible that BRDT could be a binding protein for  
419 meiotic SEs, and loss of function of BRDT could represent loss of function of meiotic SEs. Since  
420 we identified *Brdt* as a meiotic SE-adjacent gene, BRDT may contribute to a feedforward loop that  
421 putatively establishes meiotic SEs. Curiously, another protein containing bromodomains, BRWD1  
422 (Bromodomain And WD Repeat Domain Containing 1), can also recognize acetylated lysine  
423 residues and is required for postmeiotic transcription in spermatids<sup>50</sup>. Likewise, BRD4 is also  
424 associated with gene expression in spermatids<sup>51</sup>. So, given the increasing numbers of active  
425 enhancers established as PS progresses to become RS (Fig. 1), these observations collectively  
426 represent an important direction for future work: to determine the functions of bromodomain  
427 proteins in the regulation of germline enhancer activity.

428  
429 Our study elucidated distinct forms of regulation for active enhancers on autosomes versus  
430 active enhancers on sex chromosomes in spermatogenesis; these forms of regulation are mediated  
431 by the distinct functions of SCML2 on autosomes versus sex chromosomes. On the autosomes,  
432 SCML2, a highly expressed protein in undifferentiated spermatogonia<sup>3</sup>, is involved in the  
433 resolution of mitotic SEs after the mitosis-to-meiosis transition (Fig. 4), while meiotic SEs are  
434 already poised with H3K4me2 in undifferentiated spermatogonia (Fig. 6). Therefore, it is  
435 conceivable that these dual mechanisms preprogram meiotic gene expression as early as the  
436 undifferentiated spermatogonia phase of spermatogenesis, all in preparation for the unidirectional  
437 differentiation of spermatogenesis. On the other hand, on the sex chromosomes, H3K27ac  
438 deposition depends on RNF8<sup>23</sup>, a DDR factor, in addition to SCML2 (Fig. 5). Given that MDC1, a  
439 DDR factor and key regulator of MSCI<sup>43</sup>, is necessary for the localization of SCML2 on the XY  
440 body<sup>3</sup>, our results indicate that active enhancers and postmeiotic gene expression are directly  
441 downstream of a DDR pathway specific to the sex chromosomes.

442  
443 Finally, through genome-wide analyses using publicly available ChIP-seq data from  
444 many different cell types, we revealed transcription factors that might bind mitotic and meiotic  
445 enhancers, as well as mitotic and meiotic SEs (Fig. 7). Among the factors we identified, the  
446 transcriptional repressor KDM5A (also known as RBP2 or JARID1A) evinced the highest  
447 enrichment value for meiotic SEs. This is of particular interest because KDM5A was originally  
448 identified as an RB (Retinoblastoma)-binding protein and is implicated in tumorigenesis<sup>52</sup>. Since  
449 many germline-associated genes are expressed in many cancer types—or, put another way, many

450 germline-associated genes are so-called cancer/testis genes<sup>53</sup>—it is interesting to consider that the  
451 regulation of meiotic SEs could, in turn, drive or otherwise regulate germline gene expression in  
452 various cancers.

453

454 In summary, our current study provides a framework to understand enhancer activity and  
455 the regulation of gene expression during spermatogenesis. Because our study focuses on  
456 representative stages, it will be important to further dissect these mechanisms in order to fully  
457 understand the complex and well-coordinated nature of spermatogenesis. Recent studies using  
458 single cell analyses have revealed new details on the shifting, transitory transcriptomic and  
459 epigenomic environments of progressive cell types in human and mouse spermatogenesis<sup>54-59</sup>. Such  
460 dynamism is achievable through the functional interplay of complex combinations of TFs and  
461 enhancers, as well as other regulatory elements. Indeed, more than a thousand TFs are differentially  
462 expressed during the mitosis-to-meiosis transition in spermatogenesis<sup>9</sup>. Of note, the testis has the  
463 largest number of specifically expressed TFs of all organs<sup>60</sup>. The systematic determination of  
464 germline cis-regulatory elements makes for a compelling future research direction to understand  
465 germline mechanisms, including fundamental aspects of the mitotic and meiotic programs.

466

## 467 **Methods**

### 468 **Animals**

469 *Scml2*-KO mice were previously reported<sup>3</sup>.

470

### 471 **Germ cell fractionation**

472 Pachytene spermatocytes and round spermatids were isolated via BSA gravity sedimentation as  
473 previously described<sup>61</sup>. Purity was confirmed by nuclear staining with Hoechst 33342 using  
474 fluorescence microscopy. In keeping with previous studies from the Namekawa lab<sup>3,9,11,40</sup>, ≥90%  
475 purity was confirmed for all purifications. Spermatogonia were isolated as described previously<sup>8</sup>  
476 and collected from C57BL/6N mice aged 6-8 days. Testes were collected in a 24-well plate in  
477 Dulbecco's Modified Eagle Medium (DMEM) supplemented with GlutaMax (Thermo Fisher  
478 Scientific), non-essential amino acids (NEAA) (Thermo Fisher Scientific), and penicillin and  
479 streptomycin (Thermo Fisher Scientific). After removing the *tunica albuginea* membrane, testes  
480 were digested with collagenase (1 mg/ml) at 34°C for 20 min to remove interstitial cells, then  
481 centrifuged at 188×g for 5 min. Tubules were washed with the medium and then digested with  
482 trypsin (2.5 mg/ml) at 34°C for 20 min to obtain a single cell suspension. Cells were filtered with  
483 a 40-µm strainer to remove Sertoli cells, and the cell suspension was plated in a 24-well plate for 1  
484 h in the medium supplemented with 10% fetal bovine serum, which promotes adhesion of  
485 remaining somatic cells. Cells were washed with magnetic cell-sorting (MACS) buffer (PBS  
486 supplemented with 0.5% BSA and 5 mM EDTA) and incubated with CD117 (KIT) MicroBeads  
487 (Miltenyi Biotec) on ice for 20 min. Cells were washed and resuspended with MACS buffer, and  
488 filtered with a 40-µm strainer. Cells were separated by autoMACS Pro Separator (Miltenyi Biotec)  
489 with the program “possel.” Cells in the flow-through fraction were washed with MACS buffer and  
490 incubated with CD90.2 (THY1) MicroBeads (Miltenyi Biotec) on ice for 20 min. Cells were  
491 washed and resuspended with MACS buffer and filtered with a 40-µm strainer. Cells were  
492 separated by autoMACS Pro Separator (Miltenyi Biotec) with the program “posseld.” Purity was  
493 confirmed by immunostaining.

494

### 495 **ChIP-seq library preparation and sequencing**

496 Cells were suspended in chilled 1× PBS. One-eleventh volume of crosslinking solution (50 mM  
497 HEPES-NaOH pH 7.9, 100 mM NaCl, 1 mM EDTA, 0.5 mM EGTA, and 8.8% formaldehyde) was  
498 added to the cell suspension and incubated on ice for 8 min. One-twentieth volume of 2 M glycine  
499 was added to the cell suspension and incubated at room temperature for 5 min to stop the reaction.  
500 Cells were washed twice with PBS, frozen at -80°C, and lysed at 4°C for 10 min each in ChIP lysis

501 buffer 1 (50 mM HEPES pH 7.9, 140 mM NaCl, 10% glycerol, 0.5% IGEPAL-630, 0.25% Triton  
502 X-100). After centrifugation at 2,000×g for 10 min at 4°C, pellets were resuspended with ChIP  
503 lysis buffer 2 (10 mM Tris-HCl pH 8.0, 200 mM NaCl, 1 mM EDTA, 0.5 mM EGTA) and  
504 incubated at 4°C for 10 min. After centrifugation at 2,000×g for 10 min at 4°C, pellets were washed  
505 with TE containing 0.1% SDS and protease inhibitors (Sigma; 11836145001), and resuspended  
506 with the same buffer. Chromatin was sheared to approximately 200–500 bp by sonication using a  
507 Covaris sonicator at 10% duty cycle, 105 pulse intensity, 200 burst for 2 min. Sheared chromatin  
508 was cleared by centrifugation at 20,000×g for 20 min, followed by pre-incubation with Dynabeads  
509 Protein G (Thermo Fisher Scientific). Chromatin immunoprecipitation was carried out on an SX-  
510 8X IP-STAR compact automated system (Diagenode). Briefly, Dynabeads Protein G were pre-  
511 incubated with 0.1% BSA for 2 h. Then, the cleared chromatin was incubated with beads  
512 conjugated to antibodies against H3K27ac (Active Motif; 39133) at 4°C for 8 h, washed  
513 sequentially with wash buffer 1 (50 mM Tris-HCl pH 8.0, 150 mM NaCl, 1 mM EDTA, 0.1% SDS,  
514 0.1% NaDOC, and 1% Triton X-100), wash buffer 2 (50 mM Tris-HCl pH 8.0, 250 mM NaCl, 1  
515 mM EDTA, 0.1% SDS, 0.1% NaDOC, and 1% Triton X-100), wash buffer 3 (10 mM Tris-HCl pH  
516 8.0, 250 mM LiCl, 1 mM EDTA, 0.5% NaDOC, and 0.5% NP-40), wash buffer 4 (10 mM Tris-  
517 HCl pH 8.0, 1 mM EDTA, and 0.2% Triton X-100), and wash buffer 5 (10 mM Tris-HCl). DNA  
518 libraries were prepared through the ChIPmentation method<sup>62</sup>. Briefly, beads were resuspended in  
519 30 µl of the tagmentation reaction buffer (10 mM Tris-HCl pH 8.0 and 5 mM MgCl<sub>2</sub>) containing 1  
520 µl Tagment DNA Enzyme from the Nextera DNA Sample Prep Kit (Illumina) and incubated at  
521 37°C for 10 min in a thermal cycler. The beads were washed twice with 150 µl cold wash buffer 1,  
522 incubated with elution buffer (10 mM Tris-HCl pH 8.0, 1 mM EDTA, 250 mM NaCl, 0.3% SDS,  
523 0.1 µg/µl Proteinase K) at 42°C for 30 min, and then incubated at 65°C for another 5 h to reverse  
524 cross-linking. DNA was purified with the MinElute Reaction Cleanup Kit (Qiagen) and amplified  
525 with NEBNext High-Fidelity 2× PCR Master Mix (NEB). Amplified DNA was purified by  
526 Agencourt AMPure XP (Beckman Coulter). Afterwards, DNA fragments in the 250- to 500-bp size  
527 range were prepared by agarose gel size selection. DNA libraries were adjusted to 5 nM in 10 mM  
528 Tris-HCl pH 8.0 and sequenced with an Illumina HiSeq 2500.

529

#### 530 **Code availability: ChIP-seq and RNA-seq data**

531 RNA-seq data from THY1<sup>+</sup> spermatogonia, PS, and RS were downloaded from the Gene  
532 Expression Omnibus (accession number: GSE55060)<sup>3</sup>. ChIP-seq data for A-MYB and RNA-seq  
533 data from A-MYB mutant and control testes were downloaded from the Gene Expression Omnibus  
534 (accession number: GSE44690)<sup>21</sup>. ChIP-seq data for H3K4me<sub>3</sub>, and H3K4me<sub>2</sub>, and RNA-seq data  
535 from KIT<sup>+</sup> spermatogonia, were downloaded from Gene Expression Omnibus (accession number:  
536 GSE89502)<sup>40</sup>. While generated for and analyzed in this study, our H3K27ac ChIP-seq data for wild-  
537 type PS and RS were initially introduced in another study that analyzed active enhancers on the sex  
538 chromosomes<sup>23</sup>; ChIP-seq data for H3K27ac from PS and RS, were downloaded from Gene  
539 Expression Omnibus (accession number: GSE107398)<sup>23</sup>. ChIP-seq data for H3K27ac from  
540 embryonic stem cells was downloaded from Gene Expression Omnibus (accession number:  
541 GSE29184)<sup>63</sup>. ChIP-seq data for H3K27ac from sperm were downloaded from Gene Expression  
542 Omnibus (accession number: GSE79230)<sup>64</sup>.

543

#### 544 **ChIP-seq and RNA-seq data analysis**

545 Data analysis for ChIP-seq was performed in the Wardrobe Experiment Management System  
546 (<https://code.google.com/p/genome-tools/>)<sup>65</sup>. Briefly, reads were aligned to the mouse genome  
547 (mm10) with Bowtie (version 1.2.0)<sup>66</sup>, assigned to RefSeq genes (or isoforms) using the Wardrobe  
548 algorithm, and displayed on a local mirror of the UCSC genome browser as coverage. ChIP-seq  
549 peaks for H3K27ac, H3K4me<sub>2</sub>, H3K4me<sub>3</sub>, and A-MYB were identified using MACS2 (version  
550 2.1.1.20160309)<sup>24</sup>. Pearson correlations for the genome-wide enrichment of H3K27ac peaks among  
551 ChIP-seq library replicates were analyzed using SeqMonk (Babraham Institute). MANorm,

552 software designed for quantitative comparisons of ChIP-seq datasets<sup>25</sup>, was used to compare the  
553 genome-wide ChIP-seq peaks among stages in spermatogenesis. Unique peaks were defined using  
554 the following criteria: (1) defined as “unique” by the MANorm algorithm; (2) *P*-value <0.01; (3)  
555 raw counts of unique reads >10. Common peaks between two stages were defined using the  
556 following criteria: (1) defined as “common” by MANorm algorithm; (2) raw read counts of both  
557 stages >10. Average tag density profiles were calculated around transcription start sites for gene  
558 sets of somatic/progenitor genes, late spermatogenesis genes, constitutive active genes, and  
559 constitutive inactive genes as described previously<sup>4</sup>. Resulting graphs were smoothed in 200-bp  
560 windows. Enrichment levels for ChIP-seq experiments were calculated for 4-kb windows, promoter  
561 regions of genes ( $\pm 2$  kb surrounding TSSs) and enhancer regions. To normalize tag value, read  
562 counts were multiplied by 1,000,000 and then divided by the total number of reads in each  
563 nucleotide position. The total amount of tag values in promoter or enhancer regions were calculated  
564 as enrichment. The k-means clustering of differential enhancer peaks were analyzed using Cluster  
565 3.0 software. The results were further analyzed using JavaTreeview software<sup>67</sup> to visualize as  
566 heatmaps. MEME-ChIP<sup>68</sup> was used for motif discovery as described in the text. For all motif  
567 analyses, we used only peak regions ( $\pm 250$  bp from the peak summit) outside of  $\pm 1$  kb from TSSs;  
568 we chose a maximum of 3,000 peak regions from the lowest *P*-values (*P* <0.01) via MANorm  
569 analysis, and we extracted those sequences using the Table Browser<sup>69</sup>. The HOMER software  
570 package<sup>36</sup> was used for motif enrichment analyses using a customized version of HOMER that  
571 employs a log base 2 scoring system and motifs contained in the Cis-BP motif database<sup>37</sup>. To  
572 identify SEs, H3K27ac ChIP-seq data were used with the same criteria and software as previously  
573 described<sup>17,26</sup>.

574  
575 RELI (Regulatory Element Locus Intersection) analysis was performed as described  
576 previously<sup>45</sup>. In brief, genomic regions of interest (e.g., ChIP-seq peaks) were systematically  
577 aligned with a large collection of publicly available ChIP-seq data for various TFs in various  
578 cellular contexts largely taken from mouse ENCODE, and the significance of the intersection of  
579 each dataset was calculated using RELI.

580  
581 Analyses of RNA-seq data were performed in the Wardrobe Experiment Management System<sup>65</sup>.  
582 Briefly, reads were aligned by STAR (version STAR\_2.5.3a)<sup>70</sup> with “--outFilterMultimapNmax 1  
583 --outFilterMismatchNmax 2”. RefSeq annotation from the mm10 UCSC genome browser<sup>71</sup> was  
584 used. The --outFilterMultimapNmax parameter was used to allow unique alignments only, and the  
585 --outFilterMismatchNmax parameter was used to allow a maximum of 2 errors. All reads from the  
586 resulting .bam files were split for related isoforms with respect to RefSeq annotation. Then, the EM  
587 algorithm was used to estimate the number of reads for each isoform.

#### 588 589 **Accession Codes**

590 H3K27ac ChIP-seq data reported in this study are deposited to the Gene Expression Omnibus  
591 (GEO) under the accession number GSE130652. The following secure token has been created to  
592 allow review of record GSE130652 while it remains in private status: sbslqciwldgxpof

#### 593 594 **Acknowledgements**

595 We thank members of the Namekawa laboratory for discussion and helpful comments regarding  
596 the manuscript. Funding sources: The research project grant by the Azabu University Research  
597 Services Division, Ministry of Education, Culture, Sports, Science and Technology (MEXT)-  
598 Supported Program for the Private University Research Branding Project, (2016-2019), Grant-in-  
599 Aid for Research Activity Start-up (19K21196), and The Uehara Memorial Foundation Research  
600 incentive grant (2018) to S.M.; Lalor Foundation Postdoctoral Fellowship to A.S.; Albert J. Ryan  
601 Fellowship to K.G.A.; CCHMC Endowed Scholar and CpG grant awards to M.T.W.; National  
602 Institute of Health (NIH) DP2 GM119134 to A.B.; NIH R01 GM122776 and GM098605 to S.H.N.

603

604 **Author contributions**

605 The manuscript was written by S.M., K.G.A., and S.H.N., with critical feedback from all other  
606 authors, and S.M. and S.H.N. designed the study. S.M. performed the H3K27ac ChIP-seq  
607 experiments. S.M. M.Y., X.C., A.S., K.G.A., M.T.W., A.B., and S.H.N. designed and interpreted  
608 the computational analyses; S.M. performed the majority of computational analyses. S.H.N.  
609 supervised the project.

610

611 **Competing Interest Statement**

612 A.B. is a cofounder of Datirium, LLC.

613

614 **References**

615

- 616 1. Namekawa, S.H. *et al.* Postmeiotic sex chromatin in the male germline of mice. *Curr Biol*  
617 **16**, 660-7 (2006).
- 618 2. Soumillon, M. *et al.* Cellular source and mechanisms of high transcriptome complexity in  
619 the mammalian testis. *Cell Rep* **3**, 2179-90 (2013).
- 620 3. Hasegawa, K. *et al.* SCML2 Establishes the Male Germline Epigenome through Regulation  
621 of Histone H2A Ubiquitination. *Dev Cell* **32**, 574-88 (2015).
- 622 4. Sin, H.S., Kartashov, A.V., Hasegawa, K., Barski, A. & Namekawa, S.H. Poised chromatin  
623 and bivalent domains facilitate the mitosis-to-meiosis transition in the male germline. *BMC*  
624 *Biol* **13**, 53 (2015).
- 625 5. Ramskold, D., Wang, E.T., Burge, C.B. & Sandberg, R. An abundance of ubiquitously  
626 expressed genes revealed by tissue transcriptome sequence data. *PLoS Comput Biol* **5**,  
627 e1000598 (2009).
- 628 6. Brawand, D. *et al.* The evolution of gene expression levels in mammalian organs. *Nature*  
629 **478**, 343-8 (2011).
- 630 7. Kimmins, S. & Sassone-Corsi, P. Chromatin remodelling and epigenetic features of germ  
631 cells. *Nature* **434**, 583-9 (2005).
- 632 8. Hammoud, S.S. *et al.* Chromatin and transcription transitions of mammalian adult germline  
633 stem cells and spermatogenesis. *Cell Stem Cell* **15**, 239-53 (2014).
- 634 9. Maezawa, S., Yukawa, M., Alavattam, K.G., Barski, A. & Namekawa, S.H. Dynamic  
635 reorganization of open chromatin underlies diverse transcriptomes during spermatogenesis.  
636 *Nucleic Acids Res* **46**, 593-608 (2018).
- 637 10. Wang, Y. *et al.* Reprogramming of Meiotic Chromatin Architecture during  
638 Spermatogenesis. *Mol Cell* **73**, 547-561.e6 (2019).
- 639 11. Alavattam, K.G. *et al.* Attenuated chromatin compartmentalization in meiosis and its  
640 maturation in sperm development. *Nat Struct Mol Biol* **26**, 175-184 (2019).
- 641 12. Patel, L. *et al.* Dynamic reorganization of the genome shapes the recombination landscape  
642 in meiotic prophase. *Nat Struct Mol Biol* **26**, 164-174 (2019).
- 643 13. Bulger, M. & Groudine, M. Functional and mechanistic diversity of distal transcription  
644 enhancers. *Cell* **144**, 327-39 (2011).
- 645 14. Ong, C.T. & Corces, V.G. Enhancer function: new insights into the regulation of tissue-  
646 specific gene expression. *Nat Rev Genet* **12**, 283-93 (2011).
- 647 15. Calo, E. & Wysocka, J. Modification of enhancer chromatin: what, how, and why? *Mol*  
648 *Cell* **49**, 825-37 (2013).
- 649 16. Heintzman, N.D. *et al.* Histone modifications at human enhancers reflect global cell-type-  
650 specific gene expression. *Nature* **459**, 108-12 (2009).
- 651 17. Whyte, W.A. *et al.* Master transcription factors and mediator establish super-enhancers at  
652 key cell identity genes. *Cell* **153**, 307-19 (2013).

- 653 18. Parker, S.C. *et al.* Chromatin stretch enhancer states drive cell-specific gene regulation and  
654 harbor human disease risk variants. *Proc Natl Acad Sci U S A* **110**, 17921-6 (2013).
- 655 19. Hnisz, D. *et al.* Super-enhancers in the control of cell identity and disease. *Cell* **155**, 934-  
656 47 (2013).
- 657 20. Bolcun-Filas, E. *et al.* A-MYB (MYBL1) transcription factor is a master regulator of male  
658 meiosis. *Development* **138**, 3319-30 (2011).
- 659 21. Li, X.Z. *et al.* An ancient transcription factor initiates the burst of piRNA production during  
660 early meiosis in mouse testes. *Mol Cell* **50**, 67-81 (2013).
- 661 22. Creyghton, M.P. *et al.* Histone H3K27ac separates active from poised enhancers and  
662 predicts developmental state. *Proc Natl Acad Sci U S A* **107**, 21931-6 (2010).
- 663 23. Adams, S.R. *et al.* RNF8 and SCML2 cooperate to regulate ubiquitination and H3K27  
664 acetylation for escape gene activation on the sex chromosomes. *PLoS Genet* **14**, e1007233  
665 (2018).
- 666 24. Zhang, Y. *et al.* Model-based analysis of ChIP-Seq (MACS). *Genome Biol* **9**, R137 (2008).
- 667 25. Shao, Z., Zhang, Y., Yuan, G.C., Orkin, S.H. & Waxman, D.J. MANorm: a robust model  
668 for quantitative comparison of ChIP-Seq data sets. *Genome Biol* **13**, R16 (2012).
- 669 26. Loven, J. *et al.* Selective inhibition of tumor oncogenes by disruption of super-enhancers.  
670 *Cell* **153**, 320-34 (2013).
- 671 27. Adam, R.C. *et al.* Pioneer factors govern super-enhancer dynamics in stem cell plasticity  
672 and lineage choice. *Nature* **521**, 366-70 (2015).
- 673 28. Gaucher, J. *et al.* Bromodomain-dependent stage-specific male genome programming by  
674 Brdt. *Embo j* **31**, 3809-20 (2012).
- 675 29. Chuma, S. *et al.* Tdrd1/Mtr-1, a tudor-related gene, is essential for male germ-cell  
676 differentiation and nuage/germinal granule formation in mice. *Proc Natl Acad Sci U S A*  
677 **103**, 15894-9 (2006).
- 678 30. Deng, W. & Lin, H. miwi, a murine homolog of piwi, encodes a cytoplasmic protein  
679 essential for spermatogenesis. *Dev Cell* **2**, 819-30 (2002).
- 680 31. Kneitz, B. *et al.* MutS homolog 4 localization to meiotic chromosomes is required for  
681 chromosome pairing during meiosis in male and female mice. *Genes Dev* **14**, 1085-97  
682 (2000).
- 683 32. Spitz, F. & Furlong, E.E. Transcription factors: from enhancer binding to developmental  
684 control. *Nat Rev Genet* **13**, 613-26 (2012).
- 685 33. Ma, W., Noble, W.S. & Bailey, T.L. Motif-based analysis of large nucleotide data sets using  
686 MEME-ChIP. *Nat Protoc* **9**, 1428-50 (2014).
- 687 34. Bailey, T.L. *et al.* MEME SUITE: tools for motif discovery and searching. *Nucleic Acids*  
688 *Res* **37**, W202-8 (2009).
- 689 35. Oatley, J.M., Kaucher, A.V., Avarbock, M.R. & Brinster, R.L. Regulation of mouse  
690 spermatogonial stem cell differentiation by STAT3 signaling. *Biol Reprod* **83**, 427-33  
691 (2010).
- 692 36. Heinz, S. *et al.* Simple combinations of lineage-determining transcription factors prime  
693 cis-regulatory elements required for macrophage and B cell identities. *Mol Cell* **38**, 576-89  
694 (2010).
- 695 37. Weirauch, M.T. *et al.* Determination and inference of eukaryotic transcription factor  
696 sequence specificity. *Cell* **158**, 1431-1443 (2014).
- 697 38. Matson, C.K. *et al.* The mammalian doublesex homolog DMRT1 is a transcriptional  
698 gatekeeper that controls the mitosis versus meiosis decision in male germ cells. *Dev Cell*  
699 **19**, 612-24 (2010).
- 700 39. Zhou, L. *et al.* BTBD18 Regulates a Subset of piRNA-Generating Loci through  
701 Transcription Elongation in Mice. *Dev Cell* **40**, 453-466.e5 (2017).
- 702 40. Maezawa, S. *et al.* Polycomb protein SCML2 facilitates H3K27me3 to establish bivalent  
703 domains in the male germline. *Proc Natl Acad Sci U S A* **115**, 4957-4962 (2018).

- 704 41. Ichijima, Y., Sin, H.S. & Namekawa, S.H. Sex chromosome inactivation in germ cells:  
705 emerging roles of DNA damage response pathways. *Cell Mol Life Sci* **69**, 2559-72 (2012).
- 706 42. Turner, J.M. Meiotic Silencing in Mammals. *Annu Rev Genet* **49**, 395-412 (2015).
- 707 43. Ichijima, Y. *et al.* MDC1 directs chromosome-wide silencing of the sex chromosomes in  
708 male germ cells. *Genes Dev* **25**, 959-71 (2011).
- 709 44. Sin, H.S. *et al.* RNF8 regulates active epigenetic modifications and escape gene activation  
710 from inactive sex chromosomes in post-meiotic spermatids. *Genes Dev* **26**, 2737-48  
711 (2012).
- 712 45. Harley, J.B. *et al.* Transcription factors operate across disease loci, with EBNA2 implicated  
713 in autoimmunity. *Nat Genet* **50**, 699-707 (2018).
- 714 46. Zhu, Z. *et al.* Dynamics of the Transcriptome during Human Spermatogenesis: Predicting  
715 the Potential Key Genes Regulating Male Gametes Generation. *Sci Rep* **6**, 19069 (2016).
- 716 47. Ryser, S. *et al.* Gene expression profiling of rat spermatogonia and Sertoli cells reveals  
717 signaling pathways from stem cells to niche and testicular cancer cells to surrounding  
718 stroma. *BMC Genomics* **12**, 29 (2011).
- 719 48. Luoh, S.W. *et al.* Zfx mutation results in small animal size and reduced germ cell number  
720 in male and female mice. *Development* **124**, 2275-84 (1997).
- 721 49. Matzuk, M.M. *et al.* Small-molecule inhibition of BRDT for male contraception. *Cell* **150**,  
722 673-84 (2012).
- 723 50. Pattabiraman, S. *et al.* Mouse BRWD1 is critical for spermatid postmeiotic transcription  
724 and female meiotic chromosome stability. *J Cell Biol* **208**, 53-69 (2015).
- 725 51. Bryant, J.M. *et al.* Characterization of BRD4 during mammalian postmeiotic sperm  
726 development. *Mol Cell Biol* **35**, 1433-48 (2015).
- 727 52. Defeo-Jones, D. *et al.* Cloning of cDNAs for cellular proteins that bind to the  
728 retinoblastoma gene product. *Nature* **352**, 251-4 (1991).
- 729 53. Scanlan, M.J., Simpson, A.J. & Old, L.J. The cancer/testis genes: review, standardization,  
730 and commentary. *Cancer Immun* **4**, 1 (2004).
- 731 54. Sohni, A. *et al.* The Neonatal and Adult Human Testis Defined at the Single-Cell Level.  
732 *Cell Rep* **26**, 1501-1517.e4 (2019).
- 733 55. Guo, J. *et al.* The adult human testis transcriptional cell atlas. *Cell Res* **28**, 1141-1157  
734 (2018).
- 735 56. Green, C.D. *et al.* A Comprehensive Roadmap of Murine Spermatogenesis Defined by  
736 Single-Cell RNA-Seq. *Dev Cell* **46**, 651-667.e10 (2018).
- 737 57. Hermann, B.P. *et al.* The Mammalian Spermatogenesis Single-Cell Transcriptome, from  
738 Spermatogonial Stem Cells to Spermatids. *Cell Rep* **25**, 1650-1667.e8 (2018).
- 739 58. Chen, Y. *et al.* Single-cell RNA-seq uncovers dynamic processes and critical regulators in  
740 mouse spermatogenesis. *Cell Res* **28**, 879-896 (2018).
- 741 59. Wang, M. *et al.* Single-Cell RNA Sequencing Analysis Reveals Sequential Cell Fate  
742 Transition during Human Spermatogenesis. *Cell Stem Cell* **23**, 599-614.e4 (2018).
- 743 60. Lambert, S.A. *et al.* The Human Transcription Factors. *Cell* **172**, 650-665 (2018).
- 744 61. Bellve, A.R. Purification, culture, and fractionation of spermatogenic cells. *Methods*  
745 *Enzymol* **225**, 84-113 (1993).
- 746 62. Schmidl, C., Rendeiro, A.F., Sheffield, N.C. & Bock, C. ChIPmentation: fast, robust, low-  
747 input ChIP-seq for histones and transcription factors. *Nat Methods* **12**, 963-965 (2015).
- 748 63. Shen, Y. *et al.* A map of the cis-regulatory sequences in the mouse genome. *Nature* **488**,  
749 116-20 (2012).
- 750 64. Jung, Y.H. *et al.* Chromatin States in Mouse Sperm Correlate with Embryonic and Adult  
751 Regulatory Landscapes. *Cell Rep* **18**, 1366-1382 (2017).
- 752 65. Kartashov, A.V. & Barski, A. *Wardrobe - an integrated system for analysis of epigenomics*  
753 *and transcriptomics data*, (2014).

- 754 66. Langmead, B., Trapnell, C., Pop, M. & Salzberg, S.L. Ultrafast and memory-efficient  
755 alignment of short DNA sequences to the human genome. *Genome Biol* **10**, R25 (2009).  
756 67. Saldanha, A.J. Java Treeview--extensible visualization of microarray data. *Bioinformatics*  
757 **20**, 3246-8 (2004).  
758 68. Machanick, P. & Bailey, T.L. MEME-ChIP: motif analysis of large DNA datasets.  
759 *Bioinformatics* **27**, 1696-7 (2011).  
760 69. Karolchik, D. *et al.* The UCSC Table Browser data retrieval tool. *Nucleic Acids Res* **32**,  
761 D493-6 (2004).  
762 70. Dobin, A. *et al.* STAR: ultrafast universal RNA-seq aligner. *Bioinformatics* **29**, 15-21  
763 (2013).  
764 71. Meyer, L.R. *et al.* The UCSC Genome Browser database: extensions and updates 2013.  
765 *Nucleic Acids Res* **41**, D64-9 (2013).  
766



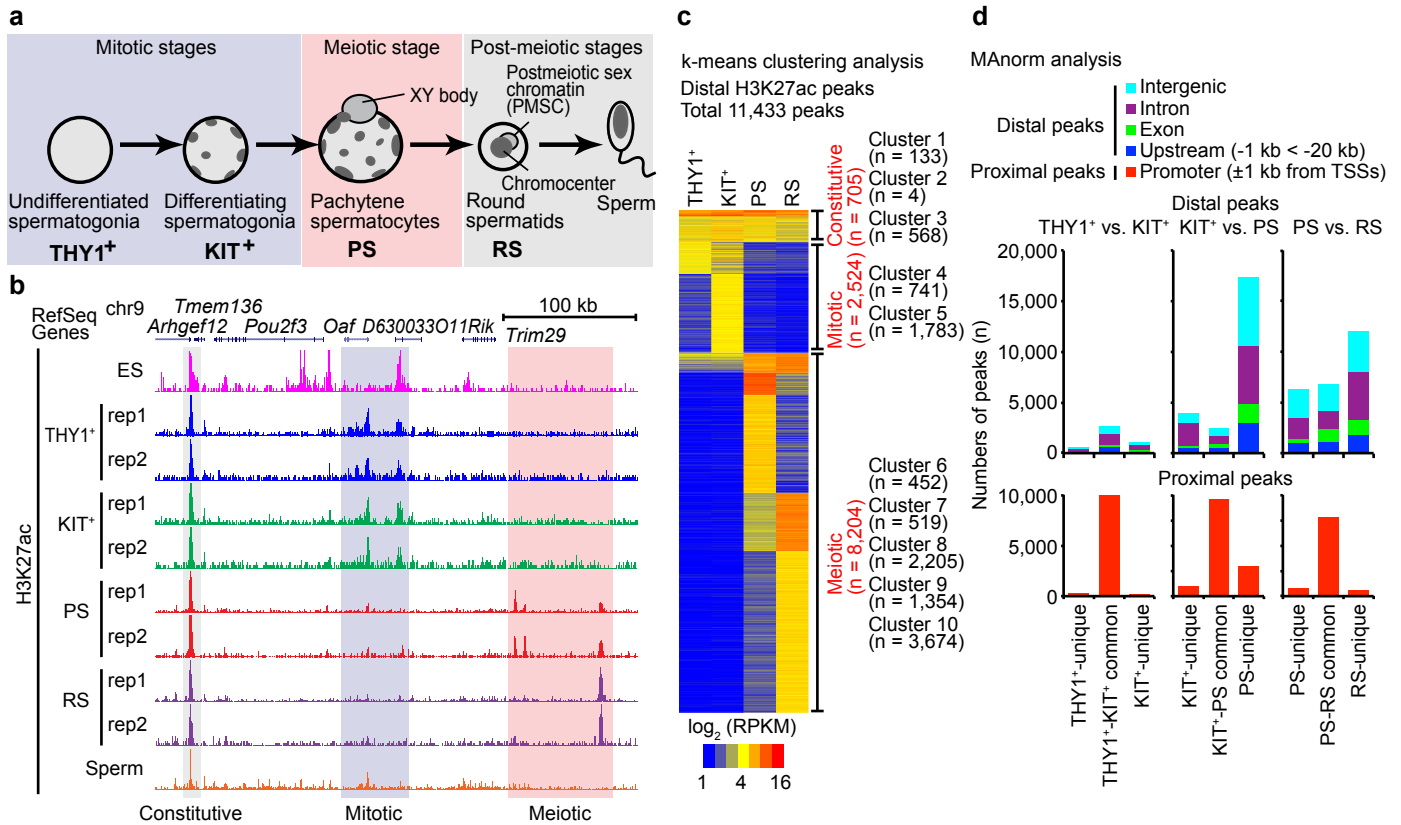

**Figure 1. The landscape of active enhancers during spermatogenesis.**

(a) Schematic of mouse spermatogenesis and the five representative stages analyzed in this study: THY1<sup>+</sup>, undifferentiated spermatogonia; KIT<sup>+</sup>, differentiating spermatogonia; PS, pachytene spermatocyte; RS, round spermatids; Sperm, epididymal spermatozoa. (b) Track view of H3K27ac ChIP-seq data with biological replicates for each stage of spermatogenesis. ES: embryonic stem cells. (c) Heatmap of distal H3K27ac peaks during spermatogenesis by k-means clustering analysis. (d) MANorm analysis of H3K27ac peaks at each transition of spermatogenesis. The genomic distribution of each peak is shown with colored bars.

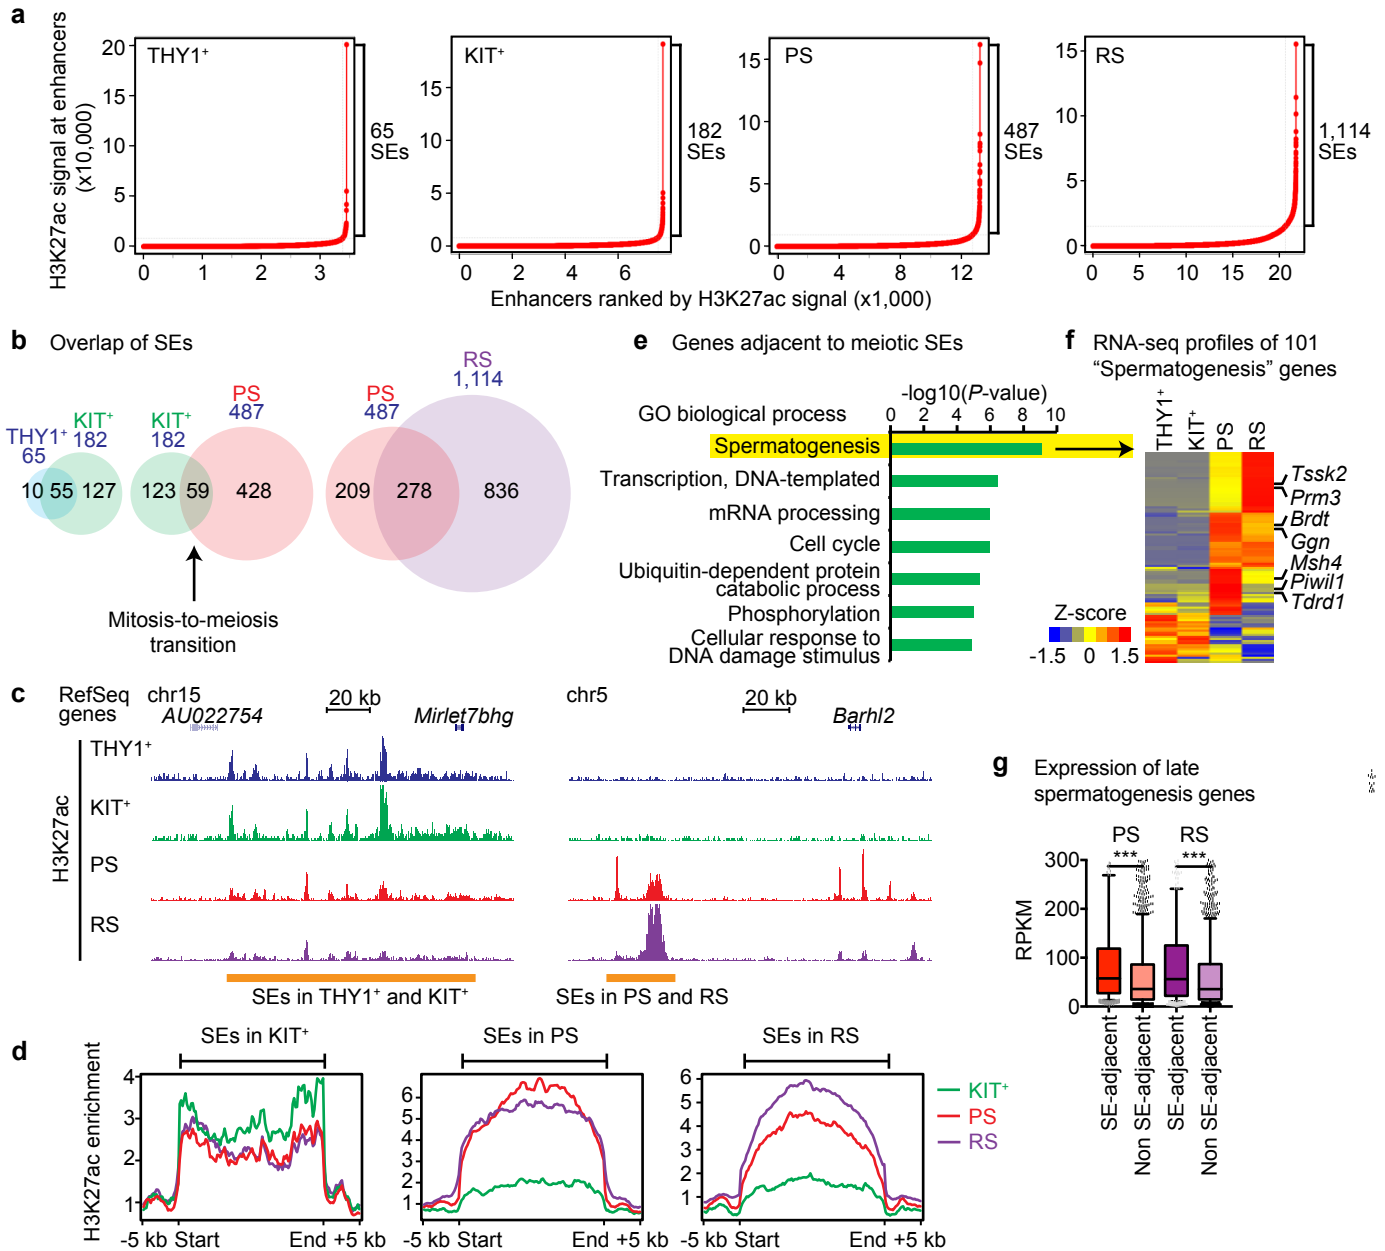

**Figure 2. Identification of super-enhancers during spermatogenesis.**

(a) Identification of SEs in representative stages of spermatogenesis. (b) Overlap of SEs in each transition during spermatogenesis. (c) Track view of H3K27ac ChIP-seq data on representative SEs in spermatogenesis. (d) Average tag density of H3K27ac ChIP-seq reads at SEs. (e) Gene ontology analysis of genes adjacent to meiotic SEs. (f) RNA-seq profiles of 101 "spermatogenesis" genes. (g) Box-and-whisker plots showing distribution of RPKM values for RNA-seq data of late spermatogenesis genes. Central bars represent medians, the boxes encompass 50% of the data points, and the whiskers indicate 90% of the data points. \*\*\*  $P < 0.0001$ , Mann-Whitney U test.

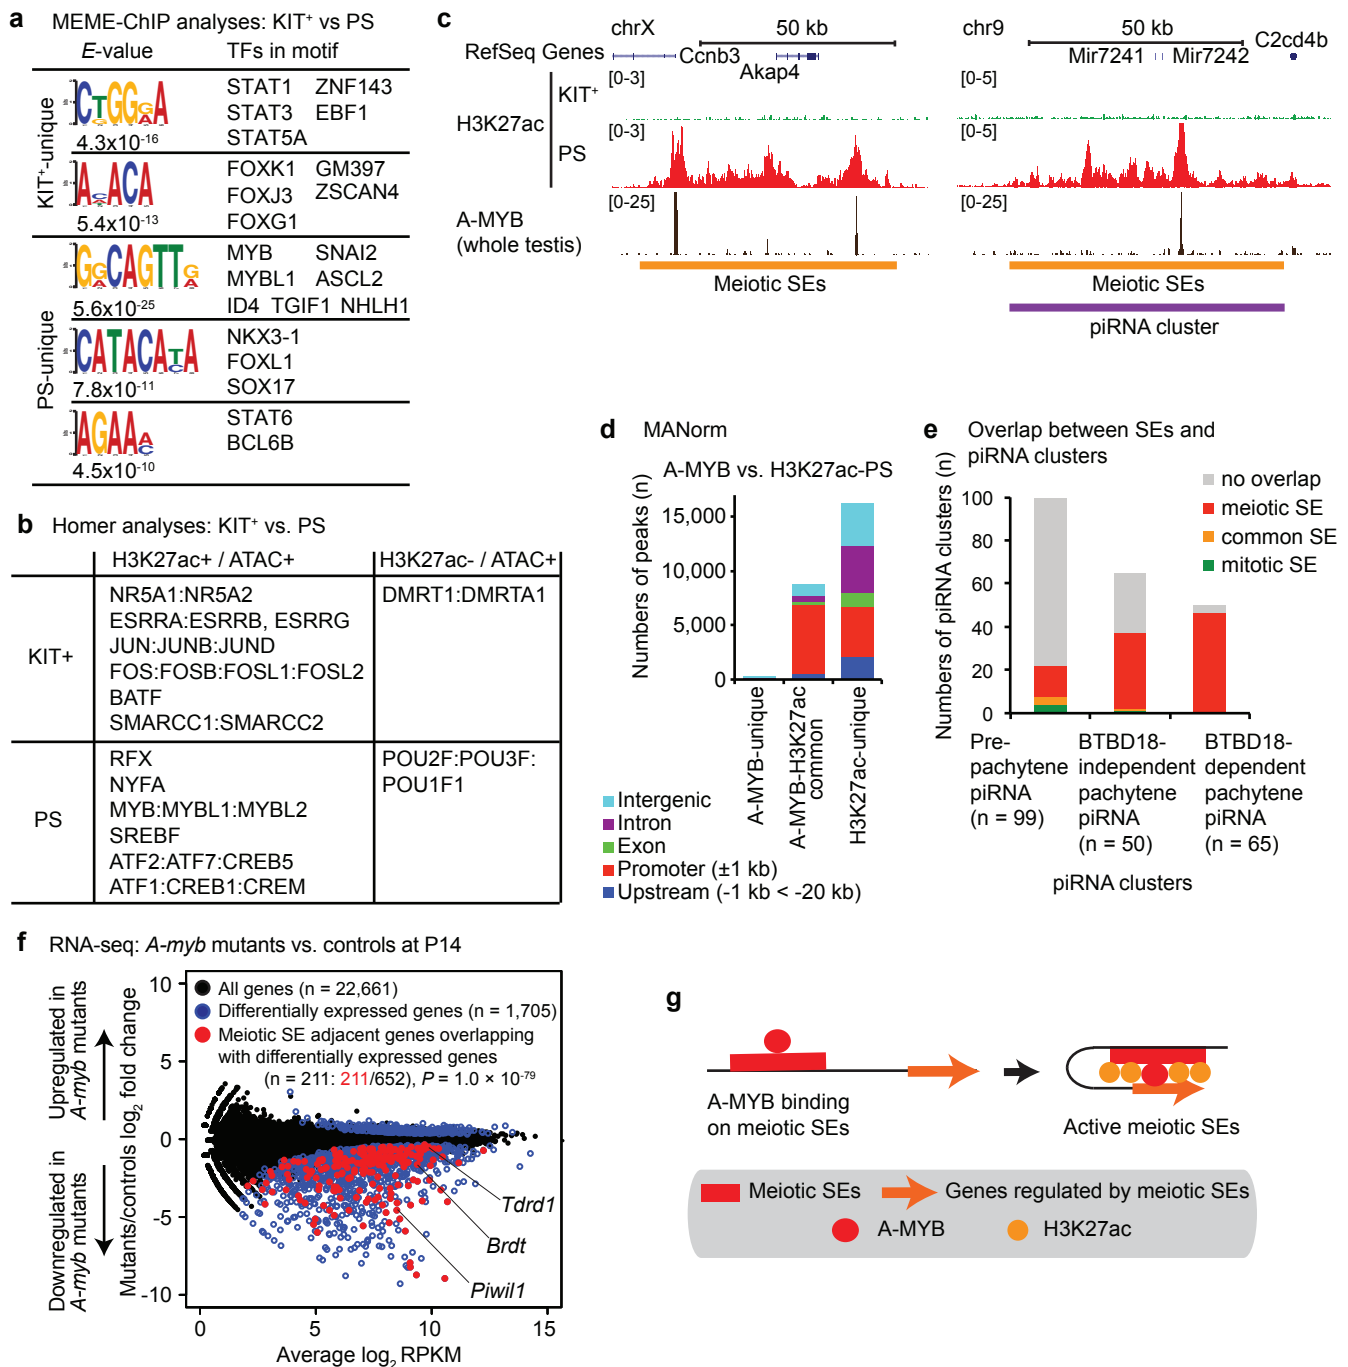

**Figure 3. A-MYB binding is PS associated with the establishment of meiotic SEs for targeted activation of germline genes.**

(a) Representative data of MEME-ChIP analysis of H3K27ac reads between KIT<sup>+</sup> and PS. (b) Summary of HOMER analysis of H3K27ac reads between KIT<sup>+</sup> and PS. (c) Track view of H3K27ac ChIP-seq data on meiotic SEs in spermatogenesis. (d) MANorm analysis between A-MYB peaks in testes and PS-H3K27ac peaks. (e) Overlap between SEs and piRNA clusters. (f) RNA-seq analysis of *A-myb* mutant versus heterozygous control testes at 14 days post-partum (dpp). The 1,705 genes evincing significant changes in expression (>2-fold change,  $P_{adj} < 0.01$ : a binomial test) in *A-myb* mutants are represented by blue circles.  $P$  value is based on a hypergeometric probability test. The 211 dysregulated genes (represented by red circles)/652 meiotic SE-adjacent genes ( $P = 1.0 \times 10^{-79}$ ) compared to 1,705 dysregulated genes/all 22,661 RefSeq genes in the genome. (g) A model of A-MYB dependent establishment of meiotic SEs.

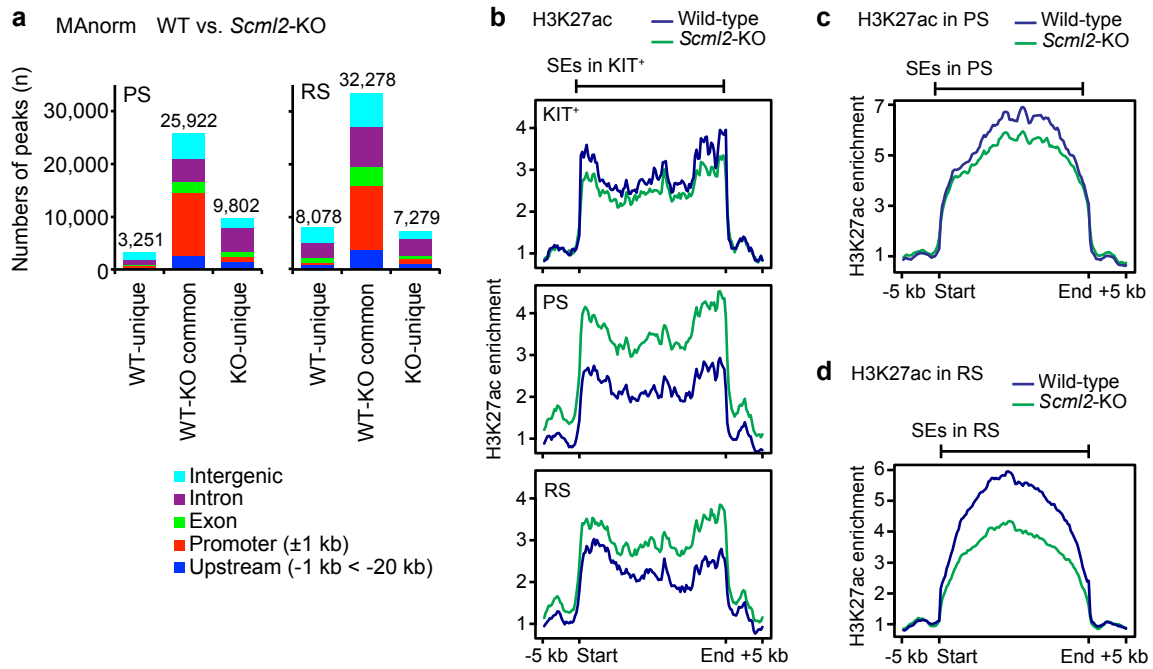

**Figure 4. SCML2 is required for the resolution of mitotic SEs during meiosis.**

(a) MANorm analysis of H3K27ac peaks in PS and RS between wild-type and *Scml2*-KO. (b) Average tag density of H3K27ac ChIP-seq reads at SEs in KIT<sup>+</sup> in each stage of spermatogenesis (KIT<sup>+</sup>, PS, RS). (c, d) Average tag density of H3K27ac ChIP-seq reads at SEs in PS (c) and SE in RS (d).

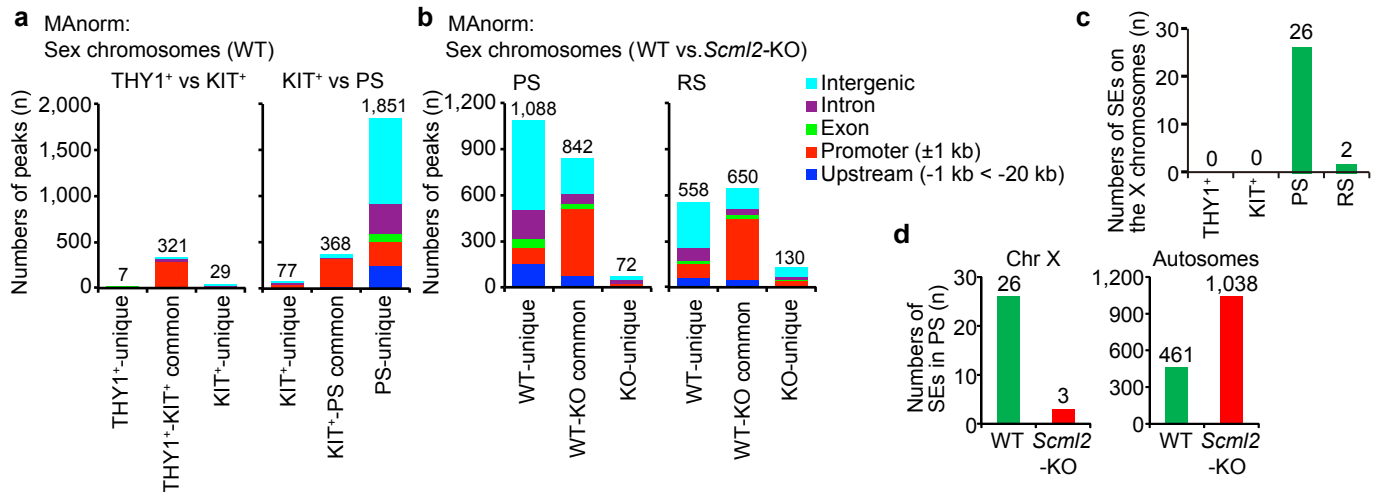

**Figure 5. SCML2 is required for the formation of SEs on the X chromosome during meiosis.**

(a) MANorm analysis of H3K27ac peaks on the sex chromosomes between THY1<sup>+</sup> and KIT<sup>+</sup> spermatogonia, and between KIT<sup>+</sup> spermatogonia and PS. (b) MANorm analysis of H3K27ac peaks on the sex chromosomes in PS and RS between wild-type and *Scml2*-KO. (c) Numbers of SEs on the X chromosome in each stage of spermatogenesis. (d) Number of SEs in PS on the X chromosome and autosomes.

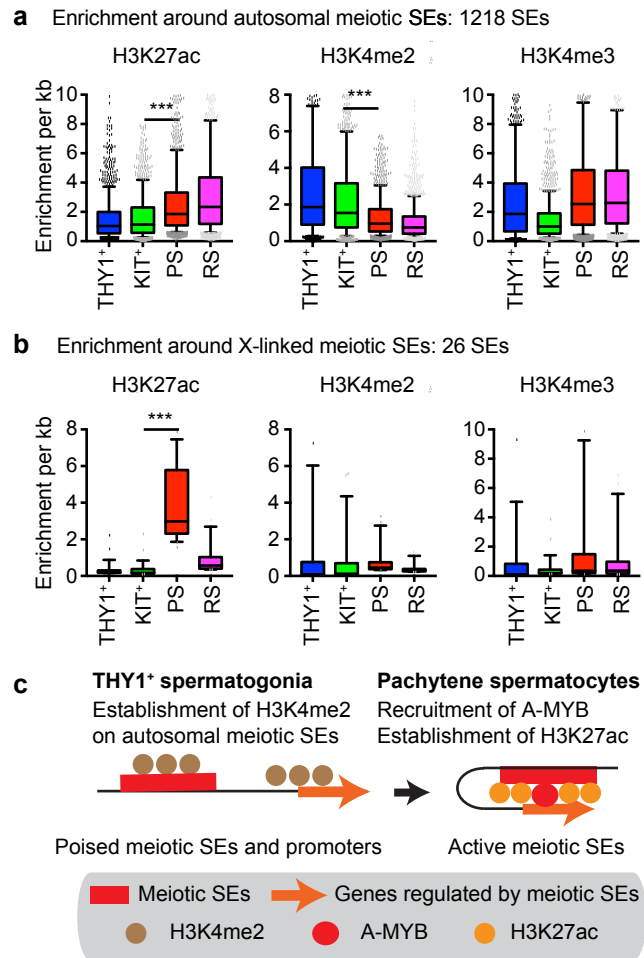

**Figure 6. Meiotic super-enhancers on autosomes are poised in undifferentiated spermatogonia.**

(a, b) Box-and-whisker plots showing distribution of ChIP-seq read enrichment around autosomal meiotic SEs (a) and around X-linked meiotic SEs (b). Central bars represent medians, the boxes encompass 50% of the data points, and the whiskers indicate 90% of the data points. \*\*\*  $P < 0.0001$ , Mann-Whitney U test. (c) A model of poised meiotic SEs and promoters in THY1<sup>+</sup> spermatogonia and establishment of active meiotic SEs in pachytene spermatocytes.

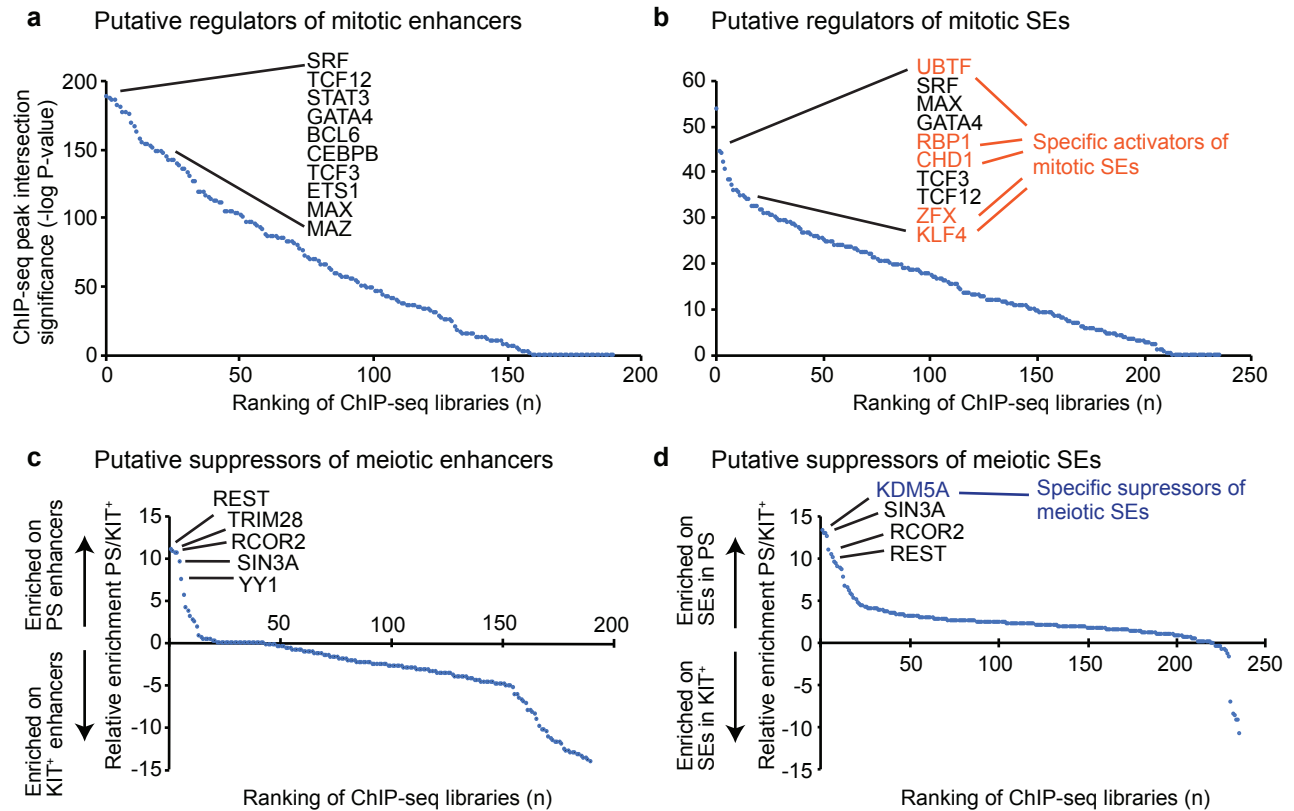

**Figure 7. Identification of key regulatory factors for mitotic and meiotic enhancers and SEs.**

(a, b) Identification of putative regulators for mitotic enhancers and SEs. The Y-axis indicates the  $-\log$  of the  $P$ -value for the overlap between publicly available ChIP-seq datasets for various TFs and mitotic enhancers (a) or SEs (b) based on the RELI algorithm (see Methods). TFs of interest are highlighted. (c, d) Comparison between enriched TFs in meiotic PS vs. KIT<sup>+</sup> enhancers (c) or SEs (d). The Y-axis indicates the ratio of the  $-\log$  of the  $P$ -value for the overlap between publicly available ChIP-seq datasets for various TFs and enhancers (c) or SEs (d) based on the RELI algorithm.
